# Supplementary material
Source: Springer Nature journal article supplement (https://www.springermedizin.de/resource/supplementary/13023_2009_172_MOESM5_ESM.pdf/9641870)

% [95% CI]

BP < 160/95 mmHg / No definition

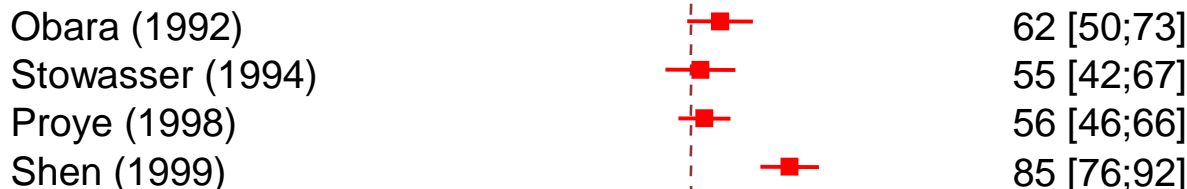

BP < 140/90 mmHg

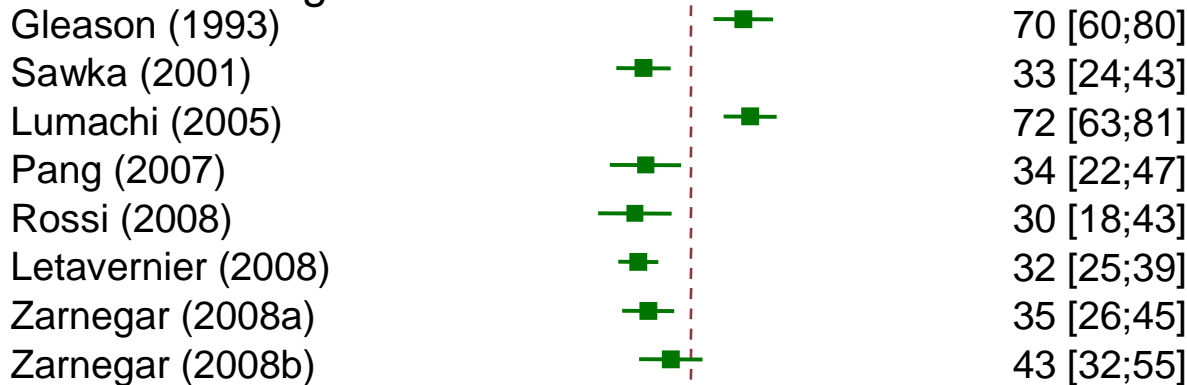

Overall (I-squared = 92.4%)

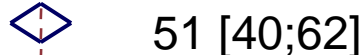

Supplement: MOESM5 [file 9641870]
